# Supplementary material
Source: publisher figshare collection journal article supplement (https://geolsoc.figshare.com/ndownloader/files/22319592)
Supplement: Supplementary file 1 [file 22319592]

## Sheet: Tabelle1
		Coordinates		X-Ray Fluorescence (University of Salzburg, Austria)																																ICP-MS (ALS Laboratories, Galway, Ireland)
Sample	Type	N	E	SiO₂ (wt%)	TiO₂ (wt%)	Al₂O₃ (wt%)	Fe₂O₃ (wt%)	MnO (wt%)	MgO (wt%)	CaO (wt%)	Na₂O (wt%)	K₂O (wt%)	P₂O₅ (wt%)	SO₃ (wt%)	F (wt%)	LOI (wt%)	Sum	Rb (ppm)	Sr (ppm)	Ba (ppm)	Th (ppm)	La (ppm)	Ce (ppm)	Nd (ppm)	Ga (ppm)	Nb (ppm)	Zr (ppm)	Y (ppm)	Sc (ppm)	Pb (ppm)	Zn (ppm)	V (ppm)	Co (ppm)	Cr (ppm)	Ni (ppm)	La (ppm)	Ce (ppm)	Pr (ppm)	Nd (ppm)	Sm (ppm)	Eu (ppm)	Gd (ppm)	Tb (ppm)	Dy (ppm)	Ho (ppm)	Er (ppm)	Tm (ppm)	Yb (ppm)	Lu (ppm)
ML 14-15	Dobra Gneiss Type B	48.312	15.241	73.05	0.15	15.01	1.42	0.03	0.3	1.92	3.97	3.84	0.06	0	0.08	0.56	100.39	99	468	953	bd	17	31	17	18	9	86	9	bd	16	45	3	bd	10	3	27.2	50.1	5.43	17.4	2.92	0.64	2.05	0.31	1.88	0.34	0.86	0.12	0.72	0.11
ML 14-16	Dobra Gneiss Type B	48.3113	15.2418	73.55	0.13	14.74	1.25	0.02	0.28	2.04	4.58	3.1	0.06	0.01	0.06	0.56	100.38	74	466	801	5	25	37	16	16	9	84	6	bd	17	35	2	3	7	5	23.2	42.7	4.74	15.2	2.74	0.7	2	0.3	1.56	0.27	0.6	0.08	0.57	0.07
ML 14-17	Dobra Gneiss Type A	48.3159	15.2241	72.91	0.31	14.22	2.31	0.04	0.74	2.55	4.44	1.96	0.1	0.21	0.07	1.19	101.05	83	456	325	28	52	102	37	15	9	168	16	bd	bd	19	33	6	12	8	53	95.4	9.86	30.4	4.49	0.93	3.15	0.45	2.65	0.58	1.64	0.21	1.6	0.27
ML 14-19	Dobra Gneiss Type A	48.316	15.2245	73.88	0.17	14.02	1.93	0.01	0.85	2.48	5.28	0.8	0.11	0.31	0.07	0.98	100.89	27	280	125	34	24	61	17	12	2	110	13	bd	7	17	20	10	8	11
ML 14-20	Dobra Gneiss Type A	48.3161	15.224	74.22	0.2	13.24	2.38	0.05	0.3	1.46	3.41	4.39	0.07	0.03	0.13	0.54	100.42	198	138	398	40	39	74	31	15	9	121	18	7	27	38	12	3	9	3
ML 14-22 augig	Dobra Gneiss Type A	48.316	15.2246	69.56	0.34	15.08	3.5	0.07	0.75	2.61	3.39	4.17	0.1	0.06	0.15	0.75	100.53	148	251	946	27	51	96	38	16	8	173	19	11	15	37	39	8	8	10
ML 14-23A	Dobra Gneiss Type A	48.3159	15.2243	72.57	0.3	13.6	3.12	0.05	0.56	2.18	3.26	3.95	0.09	0.01	0.14	0.42	100.25	152	238	744	25	41	72	24	17	9	145	19	bd	20	41	25	4	12	4
ML 14-23B	Dobra Gneiss Type A	48.3159	15.2243	71.2	0.33	14.19	3.35	0.05	0.6	2.32	3.38	4.14	0.09	0.01	0.15	0.45	100.26	164	249	768	30	53	96	37	16	8	163	19	bd	23	46	27	5	12	4
ML 14-24	Dobra Gneiss Type A	48.3159	15.2242	72.5	0.34	14.07	2.27	0.03	0.73	2.06	3.4	4.1	0.1	0.01	0.12	0.61	100.34	145	476	1395	19	30	70	23	14	11	161	13	6	15	25	28	5	11	6
ML 15-1	Dobra Gneiss Type A	48.5905	15.4309	73.93	0.21	13.52	2.14	0.02	0.73	0.95	3.3	4.9	0.07	0.01	0.09	0.74	100.61	137	166	550	43	39	88	29	14	7	127	16	bd	15	18	15	3	14	4
ML 15-2	Dobra Gneiss Type A	48.5767	15.4226	67.42	0.54	15.02	4.22	0.05	1.11	2.87	3	5.11	0.17	0.01	0.16	0.96	100.64	168	471	1628	31	106	187	69	17	15	307	25	11	6	39	61	9	21	6	95.1	162	17.85	56.5	7.43	1.25	5.46	0.85	4.66	0.97	2.7	0.39	2.44	0.38
ML 15-3	Dobra Gneiss Type A	48.554	15.4096	64.62	0.63	16.46	5.74	0.08	1.23	2.66	4.27	3.58	0.19	0.02	0.23	0.8	100.51	205	257	1318	33	96	200	66	20	22	309	34	18	14	42	53	8	21	6
ML 15-4	Dobra Gneiss Type B	48.5865	15.4045	72.68	0.16	15.43	1.49	0.03	0.35	2.68	4.91	1.94	0.05	0	0.1	0.48	100.3	66	670	765	bd	19	29	16	18	8	99	4	bd	6	52	7	bd	7	3	22.6	41.4	4.44	15.1	2.39	0.7	1.78	0.24	1.25	0.25	0.65	0.08	0.57	0.1
ML 15-5	Dobra Gneiss Type B	48.5867	15.4043	74.65	0.13	14.24	1.31	0.03	0.3	1.87	3.95	3.2	0.05	0	0.07	0.9	100.7	90	515	1073	bd	21	32	16	15	6	81	9	bd	14	44	4	bd	9	4
ML 15-6	Dobra Gneiss Type B	48.5866	15.4043	73.01	0.13	15.1	1.26	0.03	0.26	2	4.61	3.28	0.06	0.01	0.07	0.59	100.41	89	452	856	bd	18	32	17	18	8	80	12	bd	12	36	4	bd	6	4
ML 15-7	Dobra Gneiss Type B	48.5868	15.4033	73.56	0.12	14.85	1.42	0.03	0.25	2.22	4.64	2.6	0.07	0	0.07	0.52	100.35	65	568	701	4	22	29	14	19	9	96	6	bd	17	43	7	bd	bd	3
ML 15-9	Dobra Gneiss Type B	48.587	15.403	73.12	0.14	15.04	1.34	0.03	0.3	1.68	4.89	3.17	0.05	0	0.08	0.58	100.42	94	358	773	3	19	39	14	17	9	100	9	bd	9	32	6	bd	5	3
ML 15-10	Dobra Gneiss Type B	48.587	15.403	74.29	0.13	14.4	1.1	0.03	0.23	1.65	4.21	3.66	0.05	0	0.07	0.62	100.44	88	414	790	8	28	47	23	16	7	82	11	bd	11	30	7	bd	7	3
ML 15-11	Dobra Gneiss Type B	48.5905	15.3961	73.49	0.13	14.79	1.17	0.02	0.25	1.49	4.53	3.84	0.05	0	0.07	0.9	100.73	76	455	899	bd	23	22	13	16	5	89	4	bd	17	36	bd	bd	7	4
ML 15-12	Dobra Gneiss Type B	48.5894	15.395	70.1	0.24	16.83	1.67	0.04	0.58	3.38	5.49	1.34	0.07	0	0.08	1.18	101	38	678	764	3	24	40	13	18	5	130	4	bd	7	21	12	3	10	5
ML 15-13	Dobra Gneiss Type B	48.5886	15.3931	74.61	0.08	14.37	0.91	0.03	0.15	1.45	4.59	3.54	0.04	0	0.08	0.65	100.5	123	305	714	bd	11	15	8	15	9	56	8	bd	16	41	bd	bd	6	4
ML 15-15	Dobra Gneiss Type B	48.5882	15.392	70.36	0.24	16.36	1.93	0.03	0.5	3.18	4.86	2.1	0.13	0.01	0.11	0.59	100.4	69	676	636	bd	19	35	14	20	11	136	8	bd	9	51	15	bd	7	4
ML 15-16	Dobra Gneiss Type B	48.5883	15.3917	73	0.12	15.27	1.04	0.01	0.26	2	4.59	3.36	0.07	0.01	0.09	0.71	100.53	82	476	972	3	18	30	11	16	7	89	6	bd	18	33	9	bd	7	3
ML 15-17	Dobra Gneiss Type B	48.5881	15.3896	73.61	0.18	14.88	1.38	0.03	0.36	2.61	5.02	1.62	0.07	0	0.08	0.77	100.61	34	619	600	bd	23	43	19	17	8	116	6	bd	10	18	bd	bd	6	5
ML 15-19	Dobra Gneiss Type B	48.5913	15.3764	71.42	0.24	16.02	1.5	0.01	0.47	3.15	5.81	1.07	0.09	0.01	0.07	0.67	100.53	33	609	340	bd	28	48	19	19	9	127	8	bd	6	18	20	3	11	3
ML 17-39	Dobra Gneiss Type B	48.5892	15.3982	71.3	0.25	15.74	1.78	0.03	0.53	2.96	4.74	2.29	0.09	0.01	0.08	0.51	100.31	75	647	840	5	23	53	20	17	10	121	7	bd	14	34	21	3	6	9	28.5	52.4	5.79	19	2.89	0.81	2.18	0.27	1.45	0.28	0.81	0.1	0.61	0.12
ML 17-40	Dobra Gneiss Type B	48.5854	15.4074	73.12	0.15	15.07	1.33	0.03	0.35	1.8	3.95	3.87	0.07	0.01	0.06	0.33	100.14	110	489	864	5	22	38	17	18	10	79	16	6	16	28	12	bd	bd	8
ML 17-42	Dobra Gneiss Type B	48.5877	15.3734	70.27	0.3	15.92	2.29	0.04	0.84	3.24	4.87	1.76	0.15	0.02	0.12	0.72	100.54	54	549	594	bd	20	42	17	19	14	95	8	7	12	44	29	5	bd	7
ML 17-44	Dobra Gneiss Type B	48.5878	15.3735	70.37	0.33	16.09	1.58	0.01	0.88	2.62	5.24	2.33	0.06	0.25	0.08	0.19	100.03	39	418	501	7	38	63	25	18	9	155	8	8	7	18	28	6	8	11
RZ 17-05	Dobra Gneiss Type A	48.5779	15.4214	69.53	0.39	14.53	3.58	0.04	0.9	1.92	3.48	4.13	0.13	0.01	0.19	0.98	99.81	126	206	805	32	39	92	33	17	9	168	14	bd	14	29	34	4	3	11
RZ 17-06	Dobra Gneiss Type A	48.5769	15.4208	66.64	0.45	15.02	4.62	0.03	2.12	0.47	2.8	6.09	0.13	0.01	0.17	1.26	99.81	135	131	850	23	97	159	57	15	9	171	16	9	18	21	45	7	5	9
RZ 17-07	Dobra Gneiss Type A	48.554	15.4062	74.83	0.18	13.04	1.37	0.01	0.31	0.46	3.15	5.7	0.06	0.03	0.09	0.61	99.84	192	146	705	28	38	64	31	12	11	121	23	bd	19	11	13	3	10	8
RZ 18-03	Dobra Gneiss Type A	48.6282	15.4307	74.5	0.2	13.01	1.82	0.03	0.32	1.13	3.37	4.06	0.08	0.01	0.09	1.26	99.88	168	128	547	28	23	58	22	15	17	134	26	bd	13	17	13	4	8	7
RZ 18-04	Dobra Gneiss Type A	48.6235	15.4304	74.52	0.19	13.35	1.47	0.01	0.4	0.76	3.31	4.76	0.08	0.01	0.1	0.9	99.86	137	139	619	34	38	80	35	13	16	128	24	bd	14	14	13	bd	7	11
RZ 18-06	Dobra Gneiss Type A	48.6259	15.4253	74.69	0.2	13.17	1.91	0.03	0.32	1.11	3.88	3.57	0.08	0.01	0.09	0.81	99.87	106	143	546	44	29	76	29	13	16	135	26	bd	13	14	14	3	11	7
RZ 18-07	Dobra Gneiss Type A	48.6182	15.4332	74.37	0.21	13.82	1.94	0.02	0.48	0.93	6.9	0.37	0.1	0	0.06	0.73	99.93	8	102	124	22	33	77	28	14	9	129	22	7	bd	14	14	bd	8	8
RZ 18-08	Dobra Gneiss Type A	48.6182	15.4326	70.5	0.33	14.57	2.87	0.04	0.75	1.46	3.81	4.11	0.11	0.06	0.17	0.99	99.77	109	236	1095	32	92	160	55	14	14	196	19	bd	6	24	27	3	8	8
RZ 18-09	Dobra Gneiss Type A	48.6183	15.4274	73.55	0.22	13.31	2.08	0.02	1.19	0.7	4.73	2.95	0.08	0.01	0.14	0.91	99.89	84	126	353	45	60	125	47	13	13	141	17	bd	9	20	19	bd	9	7
RZ 18-10	Dobra Gneiss Type A	48.6061	15.429	74.74	0.18	13.25	1.77	0.02	0.28	1.16	3.66	3.72	0.07	0.01	0.1	0.91	99.87	124	140	548	38	37	79	33	13	14	127	26	bd	14	16	16	3	9	7
RZ 18-11	Dobra Gneiss Type A	48.6007	15.43	74.64	0.19	13.49	1.57	0.02	0.4	0.85	4.64	3.42	0.07	0.01	0.08	0.5	99.88	110	116	617	30	39	96	37	14	14	146	31	bd	16	13	15	bd	8	6
RZ 18-12	Dobra Gneiss Type A	48.5965	15.4334	72.05	0.25	14.19	2.3	0.02	1.11	0.88	3.66	4.25	0.07	0.01	0.13	0.97	99.89	110	127	478	20	22	50	22	14	8	110	14	bd	13	14	22	3	5	8
RZ 18-15	Dobra Gneiss Type A	48.5922	15.43	70.48	0.3	14.27	3.32	0.02	2.26	0.5	2.7	4.75	0.07	0.01	0.14	1.07	99.89	123	89	519	34	30	72	27	14	9	136	13	9	9	17	23	5	11	8
RZ 18-16	Dobra Gneiss Type A	48.5896	15.4283	69.46	0.31	14.7	3.3	0.03	1.16	0.7	3.16	5.18	0.08	0.02	0.13	1.58	99.81	169	228	822	32	52	93	35	13	9	144	22	9	7	27	34	5	10	8	58	100.5	10.25	29.6	4.33	0.89	3.43	0.5	3.3	0.71	2.28	0.34	2.32	0.37
RZ 18-17	Dobra Gneiss Type B	48.5934	15.3774	69.76	0.29	16.21	2.03	0.03	1.2	2.67	5.22	1.37	0.14	0	0.09	0.84	99.85	36	452	423	3	17	31	15	18	10	93	8	bd	6	30	27	bd	10	7
RZ 18-19	Dobra Gneiss Type B	48.5914	15.359	69.36	0.27	16.62	1.78	0.04	0.72	3.12	5.4	1.52	0.1	0.01	0.07	0.82	99.83	37	612	616	5	14	37	10	17	9	117	6	bd	8	28	17	3	9	8
RZ 18-20 A	Dobra Gneiss Type B	48.5911	15.3588	70.6	0.26	16	1.63	0.02	0.62	3.12	5.54	0.77	0.08	0.01	0.07	1.12	99.84	22	621	345	bd	10	43	9	16	6	120	3	bd	10	20	21	7	14	13
RZ 18-21	Dobra Gneiss Type B	48.5933	15.4176	70.93	0.21	15.7	1.59	0.03	0.67	2.35	5.1	2.11	0.09	0.02	0.09	0.94	99.83	51	538	798	bd	9	30	7	16	8	110	4	bd	7	33	14	3	8	8
RZ 18-25	Dobra Gneiss Type A	48.5668	15.416	74.32	0.2	13.36	1.88	0.03	0.4	1.01	3.13	4.62	0.08	0.01	0.13	0.71	99.88	185	127	554	44	29	78	26	14	16	136	25	bd	17	21	14	3	11	8
RZ 18-26	Dobra Gneiss Type A	48.5647	15.4185	74.78	0.13	13.33	1.22	0.01	0.32	0.79	3.39	4.83	0.07	0.01	0.09	0.92	99.89	149	154	582	36	29	64	21	14	12	112	13	6	9	10	12	bd	11	9	30.6	61.2	6.42	18.5	3.01	0.45	2.17	0.32	2.06	0.49	1.35	0.22	1.49	0.25
RZ 18-27	Dobra Gneiss Type A	48.557	15.4084	73.32	0.15	14.02	1.55	0.02	0.23	0.97	3.57	4.89	0.09	0.01	0.12	0.93	99.87	214	96	481	36	25	54	19	15	20	124	37	7	24	16	8	bd	7	6
RZ 18-28	Dobra Gneiss Type A	48.5569	15.4086	63.47	0.59	16.07	5.92	0.08	1.55	3.3	3.57	3.4	0.31	0.02	0.28	1.13	99.69	176	560	1505	23	24	68	17	16	17	212	21	14	10	46	107	9	14	7	20.5	61.4	4.54	15.3	2.56	0.92	2.91	0.5	3.37	0.75	2.38	0.36	2.84	0.42
RZ 18-29	Dobra Gneiss Type A	48.557	15.4088	73.05	0.27	13.64	2.17	0.03	0.46	1.32	2.97	4.71	0.11	0.01	0.13	0.95	99.82	153	194	833	28	26	84	17	13	14	166	13	8	14	22	23	3	9	7	27.2	81.6	5.92	16.8	2.45	0.69	1.93	0.3	2.02	0.49	1.32	0.22	1.67	0.29
RZ 18-30	Dobra Gneiss Type A	48.5569	15.4089	74.19	0.17	13.54	1.42	0.01	0.4	0.62	3.48	4.85	0.11	0.01	0.1	0.96	99.86	153	118	692	28	47	92	40	14	10	120	29	bd	13	12	10	bd	8	6
RZ 18-31	Dobra Gneiss Type A	48.5567	15.4101	72.13	0.27	14.09	2.65	0.03	0.73	1.18	3.95	3.8	0.12	0.01	0.12	0.73	99.81	114	182	874	33	61	105	41	14	13	160	17	6	12	25	23	4	15	8
RZ 18-32	Dobra Gneiss Type A	48.5568	15.4108	74.32	0.17	13.49	1.66	0.02	0.53	0.75	3.51	4.54	0.09	0.01	0.11	0.7	99.9	154	108	459	40	34	76	26	14	20	120	27	bd	15	17	15	bd	11	7
RZ 18-33	Dobra Gneiss Type A	48.5568	15.4108	74.62	0.18	13.19	1.7	0.02	0.37	0.98	3.49	4.46	0.11	0.01	0.11	0.64	99.88	169	131	555	32	22	63	20	13	20	123	21	bd	22	17	14	bd	8	6
RZ 18-35	Dobra Gneiss Type A	48.4752	15.3426	75.65	0.14	13.47	1.06	0.01	0.21	0.98	4.53	3.28	0.07	0.01	0.08	0.41	99.9	136	145	414	25	26	55	23	15	13	104	30	bd	17	12	bd	bd	8	7
RZ 18-36	Dobra Gneiss Type A	48.4656	15.3361	74.25	0.21	13.34	1.9	0.03	0.3	1.21	2.91	4.84	0.09	0.01	0.15	0.62	99.86	213	148	663	33	29	55	22	14	15	138	23	bd	18	20	14	4	11	8
DR 19-01	Dobra Gneiss Type A	48.629	15.4196	73.86	0.22	13.38	1.79	0.02	1.25	0.55	3.44	5.15	0.07	0	0.13	0.54	100.4	144	88	540	38	29	66	26	14	18	144	23	7	12	13	17	bd	4	7
DR 19-02	Dobra Gneiss Type B	48.624	15.4093	73.69	0.13	15.14	1.15	0.02	0.27	1.92	4.29	3.06	0.07	0	0.07	0.59	100.4	90	476	845	4	19	32	17	17	8	84	11	bd	11	35	bd	bd	10	9
DR 19-03	Dobra Gneiss Type B	48.6213	15.4174	75.72	0.05	13.87	0.54	0.01	0.2	0.85	5.33	3.23	0.08	0	0.05	0.39	100.32	71	153	254	bd	3	bd	14	14	10	26	17	bd	21	10	bd	bd	10	9
DR 19-05	Dobra Gneiss Type B	48.6153	15.4215	73.42	0.15	15.06	1.2	0.03	0.4	1.67	6.76	1.04	0.08	0.01	0.06	0.36	100.24	24	338	575	3	16	37	20	18	11	91	18	bd	bd	24	bd	bd	10	6
DR 19-06	Dobra Gneiss Type A	48.6011	15.4294	74.18	0.21	13.57	1.94	0.02	0.37	1.12	3.22	5.04	0.08	0.01	0.09	0.58	100.43	195	169	673	39	20	67	21	14	17	163	24	bd	18	17	12	bd	11	8
DR 19-07	Dobra Gneiss Type A	48.6011	15.4298	75.28	0.18	13.38	1.56	0.02	0.49	1.48	4.76	2.58	0.07	0	0.06	0.42	100.28	84	217	434	39	39	85	38	15	17	142	31	6	12	14	16	3	10	8
DR 19-08	Dobra Gneiss Type A	48.6011	15.4298	75.65	0.15	13.15	1.63	0.02	0.2	0.93	3.57	4.42	0.08	0.01	0.07	0.6	100.48	180	100	464	43	37	75	37	15	19	121	28	4	20	17	10	bd	11	9
DR 19-09	Dobra Gneiss Type B	48.5955	15.4137	72.49	0.14	15.73	1.19	0.02	0.28	1.94	4.58	3.29	0.07	0	0.06	0.55	100.34	78	541	1106	bd	16	31	19	17	9	74	12	bd	14	27	bd	bd	9	8
DR 19-10	Dobra Gneiss Type B	48.5967	15.4152	71.84	0.16	15.88	1.38	0.04	0.89	2.23	5.99	1.29	0.08	0	0.07	0.65	100.5	30	492	516	6	31	48	21	16	7	90	9	bd	8	14	11	4	6	9
DR 19-11	Dobra Gneiss Type B	48.5964	15.4154	73.43	0.16	14.99	1.41	0.03	0.39	1.72	5.09	2.48	0.07	0	0.07	0.62	100.46	62	384	861	bd	20	40	16	16	9	102	7	bd	8	52	bd	3	11	7
DR 19-13	Dobra Gneiss Type B	48.599	15.414	73.65	0.12	15.11	1.1	0.03	0.24	1.75	4.18	3.48	0.11	0	0.09	0.71	100.57	128	397	714	3	15	30	13	17	9	58	11	bd	8	41	bd	bd	6	8
DR 19-14	Dobra Gneiss Type B	48.5932	15.3922	73.57	0.17	14.89	1.39	0.02	0.61	1.47	6.13	1.47	0.07	0	0.06	0.56	100.41	33	383	714	5	27	51	25	17	13	96	8	bd	bd	18	11	4	10	8
DR 19-15	Dobra Gneiss Type A	48.6027	15.4188	75.74	0.07	13.3	1.1	0.01	0.21	0.75	3.9	4.66	0.06	0.01	0.1	0.67	100.58	241	81	219	33	22	53	22	15	16	73	34	bd	26	26	7	3	7	7
DR 19-16	Dobra Gneiss Type A	48.5744	15.4032	74.65	0.13	13.68	1.36	0.02	0.28	0.99	3.82	4.76	0.08	0.01	0.11	0.38	100.27	219	108	375	40	15	39	18	16	18	106	31	bd	23	14	9	bd	14	8
DR 19-17	Dobra Gneiss Type B	48.581	15.3957	70.87	0.23	16.22	1.67	0.03	0.5	2.4	4.93	2.78	0.09	0.01	0.08	0.65	100.46	76	554	832	3	23	49	20	19	10	125	7	bd	8	32	11	bd	15	8
DR 19-18	Dobra Gneiss Type A	48.542	15.3342	72.29	0.2	15.01	1.38	0.03	0.55	1.3	4.14	4.65	0.14	0.01	0.09	0.64	100.43	148	516	997	18	27	52	26	18	11	134	14	7	80	21	13	bd	18	12
DR 19-19	Dobra Gneiss Type A	48.4877	15.3328	74.02	0.15	13.9	1.57	0.02	0.22	1.03	3.41	5.33	0.09	0.01	0.09	0.57	100.41	240	105	693	25	36	98	32	15	13	136	27	7	33	19	7	bd	12	9
DR 19-20	Dobra Gneiss Type A	48.4692	15.2995	75.23	0.13	13.44	1.33	0.02	0.26	0.94	3.53	4.84	0.07	0.01	0.09	0.63	100.52	216	99	405	36	34	70	33	14	17	101	36	bd	22	15	12	bd	12	9
DR 19-21	Dobra Gneiss Type B	48.4684	15.2911	74.03	0.11	14.9	0.82	0.02	0.23	1.67	4.18	3.76	0.06	0	0.07	0.75	100.6	108	371	743	3	14	28	10	14	9	69	23	bd	21	25	bd	bd	8	8
DR 19-24	Dobra Gneiss Type B	48.4294	15.2488	72.43	0.07	16.5	0.72	0.03	0.14	2.94	6.06	0.91	0.05	0	0.04	0.58	100.47	21	521	190	bd	18	40	15	18	8	85	11	bd	9	20	9	bd	8	8
DR 19-27	Dobra Gneiss Type A	48.405	15.234	72.91	0.24	14.15	2.3	0.04	0.39	1.42	3.27	4.85	0.08	0.01	0.15	0.68	100.49	228	180	811	44	67	123	48	16	19	149	13	bd	17	32	22	4	14	9
DR 19-28	Dobra Gneiss Type A	48.3877	15.2213	73.18	0.15	14.44	2.27	0.06	0.28	1.03	4.23	4.12	0.05	0.01	0.07	0.78	100.67	163	76	265	28	32	57	23	16	15	93	27	bd	24	24	bd	3	12	9
DR 19-29	Dobra Gneiss Type A	48.323	15.2176	71.49	0.45	14.23	3.42	0.04	0.65	1.35	2.87	4.97	0.14	0.01	0.15	0.58	100.35	199	117	1004	25	63	113	53	16	13	198	42	bd	23	51	39	7	25	17
DR 19-30	Dobra Gneiss Type B	48.3346	15.2398	72.47	0.19	15.65	1.4	0.02	0.38	1.85	5.32	2.4	0.08	0	0.08	0.6	100.44	60	407	782	5	22	39	18	17	8	100	9	bd	bd	25	15	3	15	7
DR 19-31	Dobra Gneiss Type A	48.2967	15.2171	73.44	0.35	13.59	2.53	0.03	0.48	1.55	3.19	4.38	0.11	0.01	0.14	0.55	100.35	192	109	781	29	68	139	58	17	17	183	55	8	16	28	26	5	14	12
DR 19-32	Dobra Gneiss Type A	48.2979	15.2174	72.04	0.38	13.83	3.02	0.04	0.52	1.58	3.1	4.94	0.13	0.01	0.17	0.4	100.16	223	128	1109	26	56	128	37	17	15	200	26	8	23	40	29	5	15	11
bd = below detection limit; LOI = loss on ignition
[truncated: 4 more columns]
